# Supplementary material
Source: PubMed Central journal article supplement (PMC3486954)

# Supporting Figure 1

## A

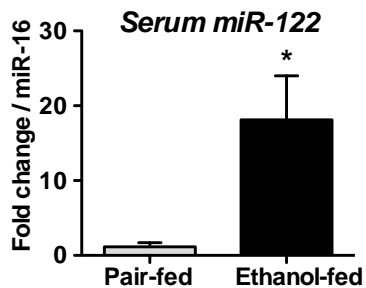

## B

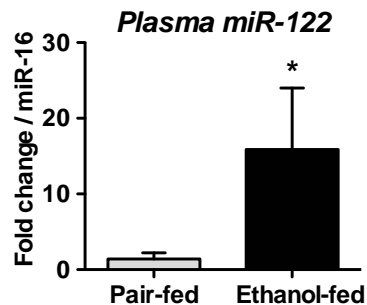

## C

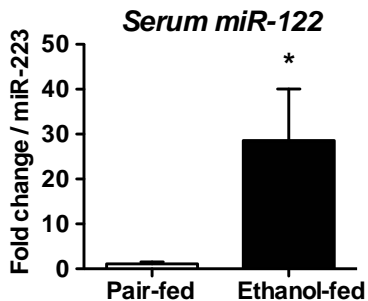

## D

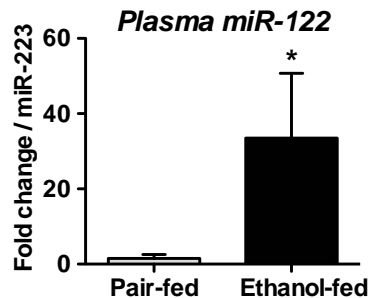

## Supporting Figure 2

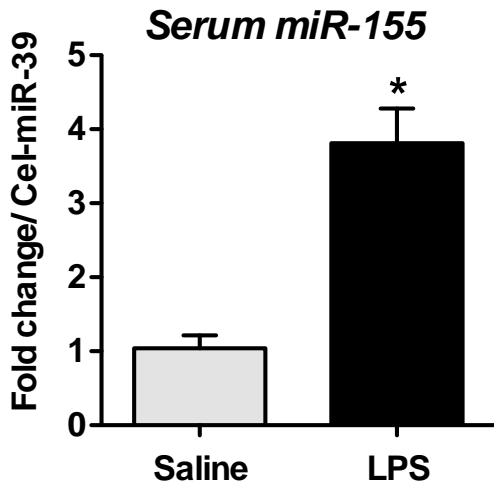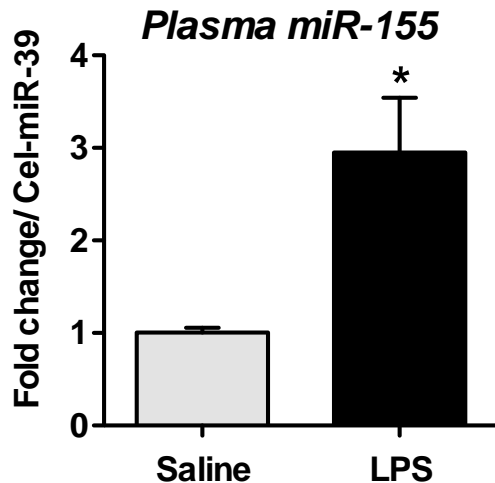

# Supporting Figure 3

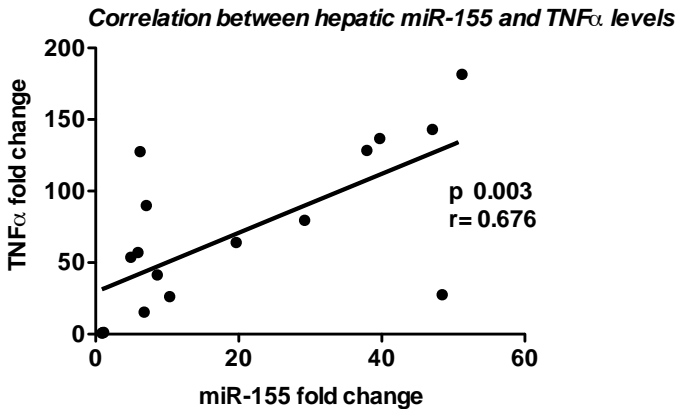

# Supporting Figure 4

## A

Fresh samples

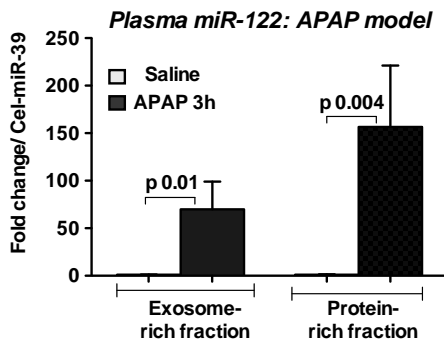

## B

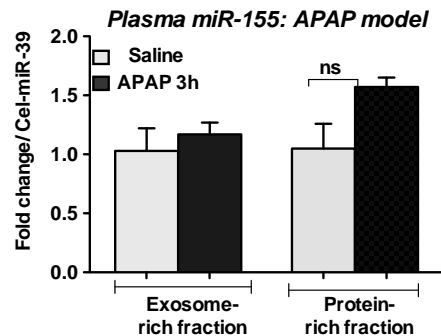

## C

Frozen samples

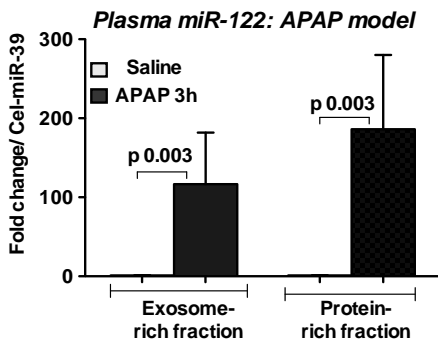

## D

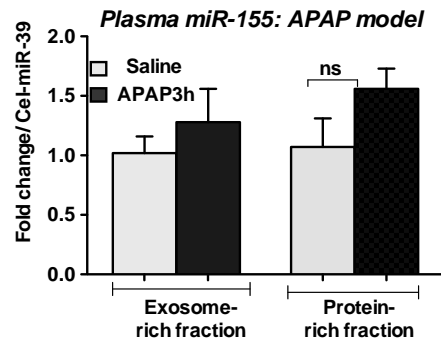

# Supporting Figure 5

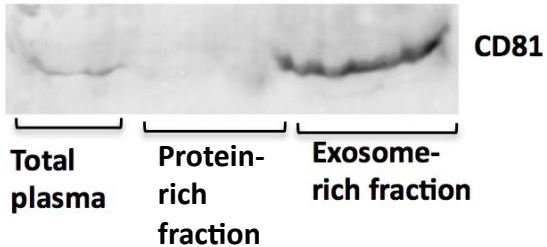

# Supporting Figure 6

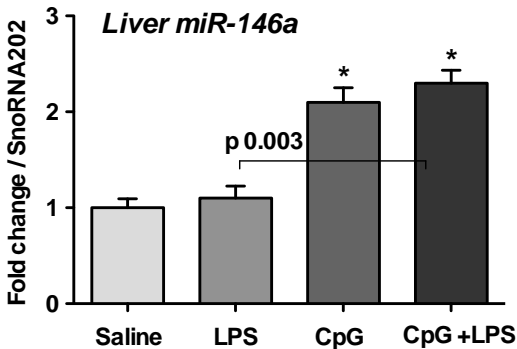

# Supporting Figure 7

**ALD model**

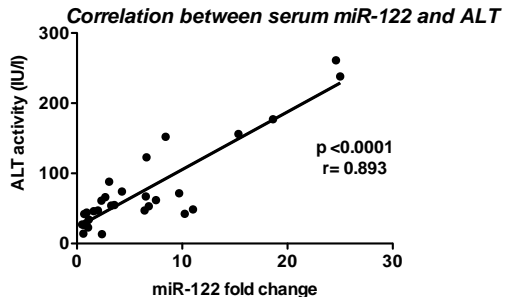

**APAP model**

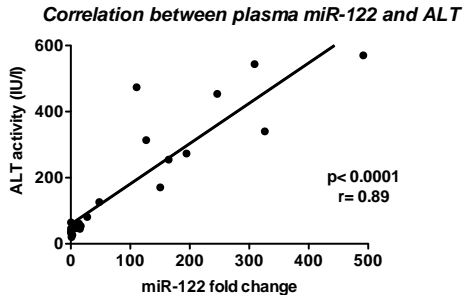

**CpG+LPS model**

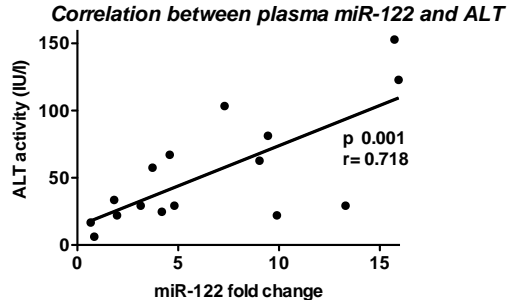

Supplement: NIHMS384313-supplement-Supp_Fig_S1-S7.pdf [file NIHMS384313-supplement-Supp_Fig_S1-S7.pdf]
